# Supplementary material for: Establishment of an Inactivation Method for Ebola Virus and SARS-CoV-2 Suitable for Downstream Sequencing of Low Cell Numbers
Source: MDPI journal article supplement (doi:10.3390/pathogens12020342), 2023-02-17
Supplement: s1 [file s1]

# Establishment of an Inactivation Method for Ebola Virus and SARS-CoV-2 Suitable for Downstream Sequencing of Low Cell Numbers

Judith Olejnik <sup>1,2</sup>, Juliette Leon <sup>3,4</sup>, Daniel Michelson <sup>3</sup>, Kaitavjeet Chowdhary <sup>3</sup>, Silvia Galvan-Pena <sup>3</sup>, Christophe Benoist <sup>3</sup>, Elke Mühlberger <sup>1,2,\*</sup> and Adam J Hume <sup>1,2,5,\*</sup>

<sup>1</sup> Department of Microbiology, Boston University School of Medicine, Boston, MA 02118, USA

<sup>2</sup> National Emerging Infectious Diseases Laboratories, Boston University, Boston, MA 02218, USA

<sup>3</sup> Department of Immunology, Blavatnik Institute, Harvard Medical School, Boston, MA 02115, USA

<sup>4</sup> INSERM UMR 1163, Institut Imagine, University of Paris, 75015 Paris, France

<sup>5</sup> Center for Emerging Infectious Diseases Policy & Research, Boston University, Boston, MA 02118, USA

\* Correspondence: muehlber@bu.edu (E.M.); hume@bu.edu (A.J.H.);

Tel.: +1-617-358-9153 (E.M.); +1-617-358-9151 (A.J.H.)

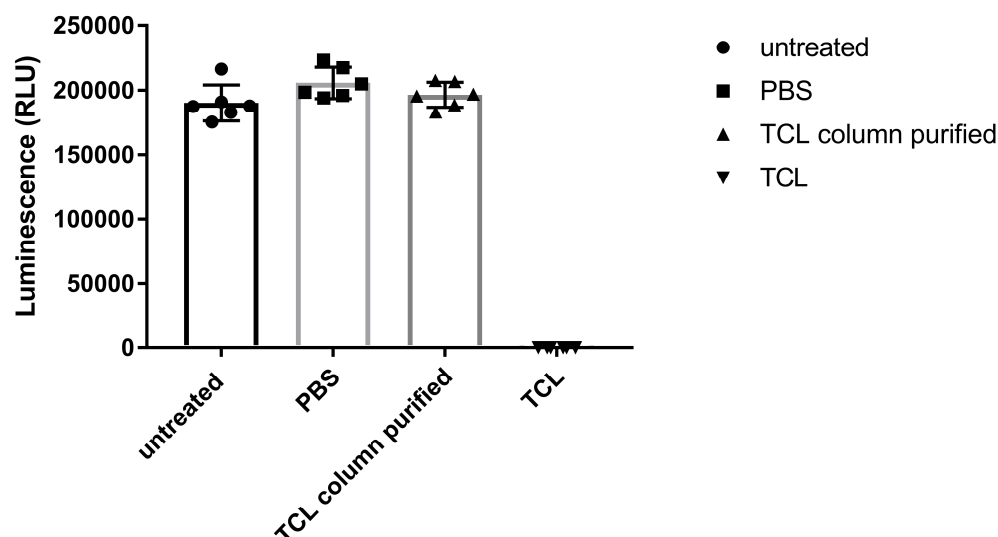

**Figure S1.** Reduction in cytotoxicity of TCL buffer using column purification. Vero E6 cells were left untreated or incubated with PBS, TCL supplemented with  $\beta$ -mercaptoethanol at a final concentration of 1% (v/v), or column purified TCL containing 1%  $\beta$ -mercaptoethanol using the same ratio of sample to cell culture medium (v/v) as used for the TCL buffer inactivation testing. After incubation for 1 day, cell viability was determined. Each sample was prepared in 6 replicates, control cells were left untreated.

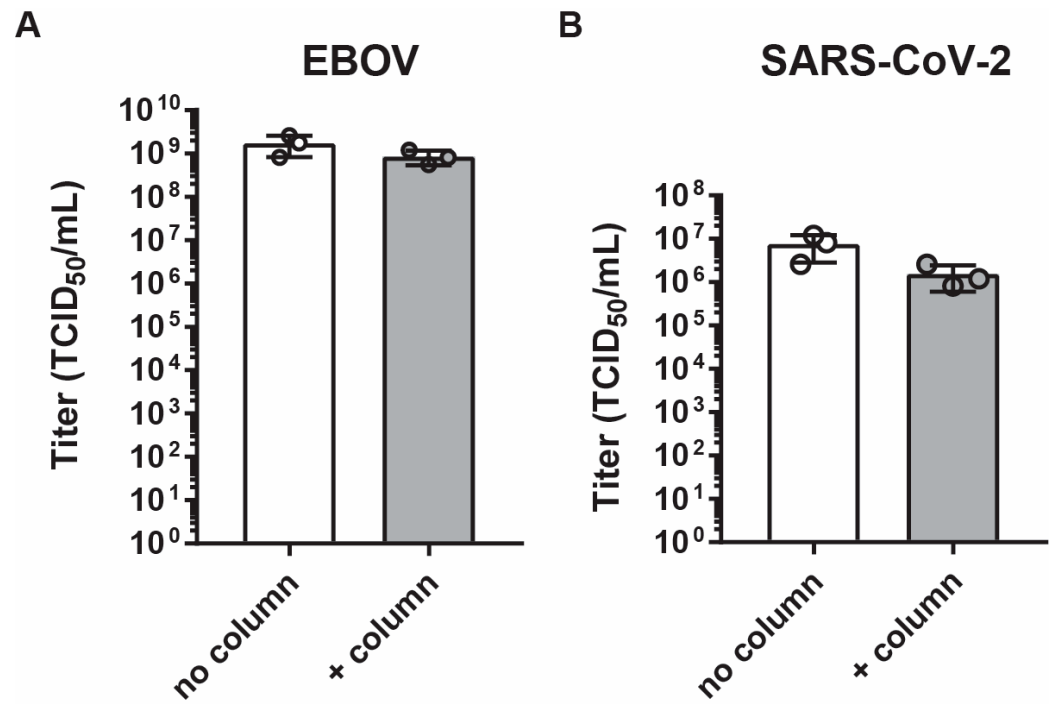

**Figure S2.** Effect of column purification on virus recovery. 0.5 mL of either a  $2.58 \times 10^9$  TCID<sub>50</sub> units/mL stock of EBOV-ZsGreen or a  $1.2 \times 10^7$  TCID<sub>50</sub> units/mL stock of SARS-CoV-2 were added to size exclusion columns. Column purification was performed according to the manufacturer's instructions. Viral titers of samples eluted from the column and non-column purified virus stock were determined by TCID<sub>50</sub> assay.

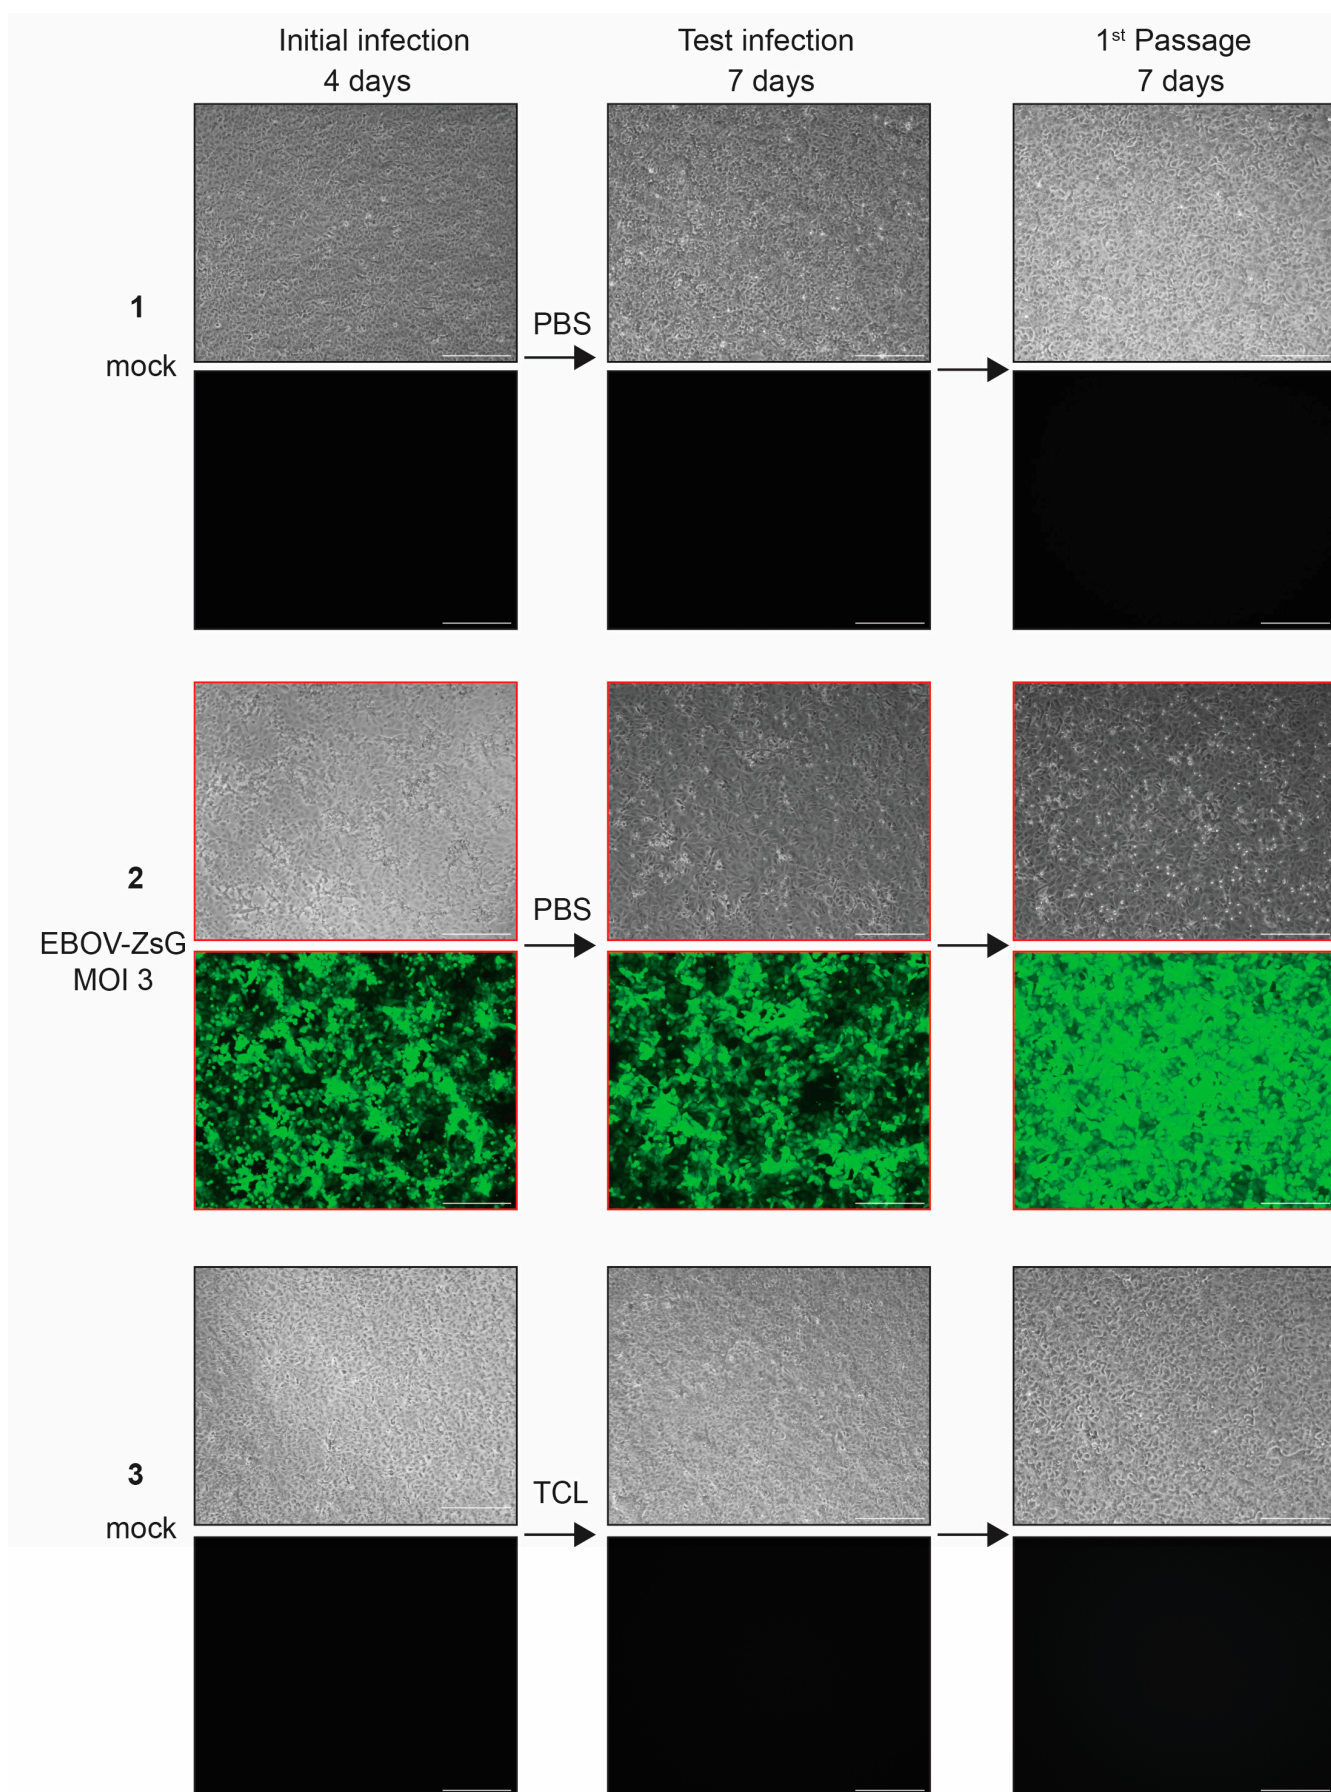

**Figure S3.** (1/3) Higher resolution versions of images from Figure 1. Scale bars = 250  $\mu$ m.

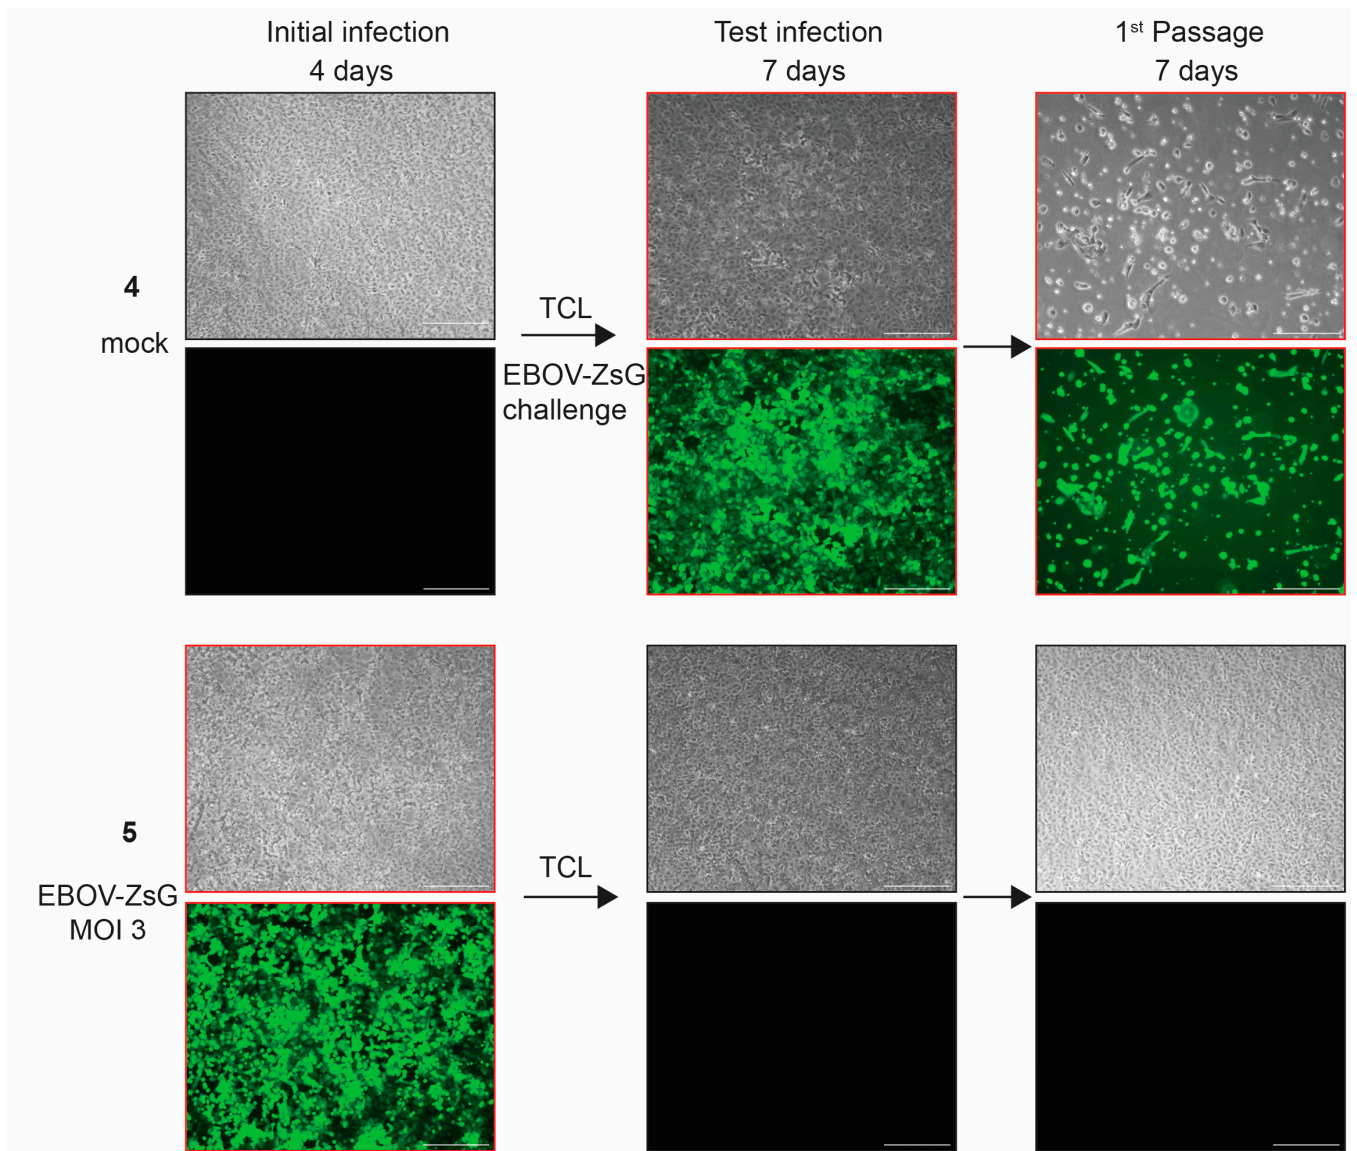

**Figure S3. (2/3)** Higher resolution versions of images from Figure 1. Scale bars = 250  $\mu$ m.



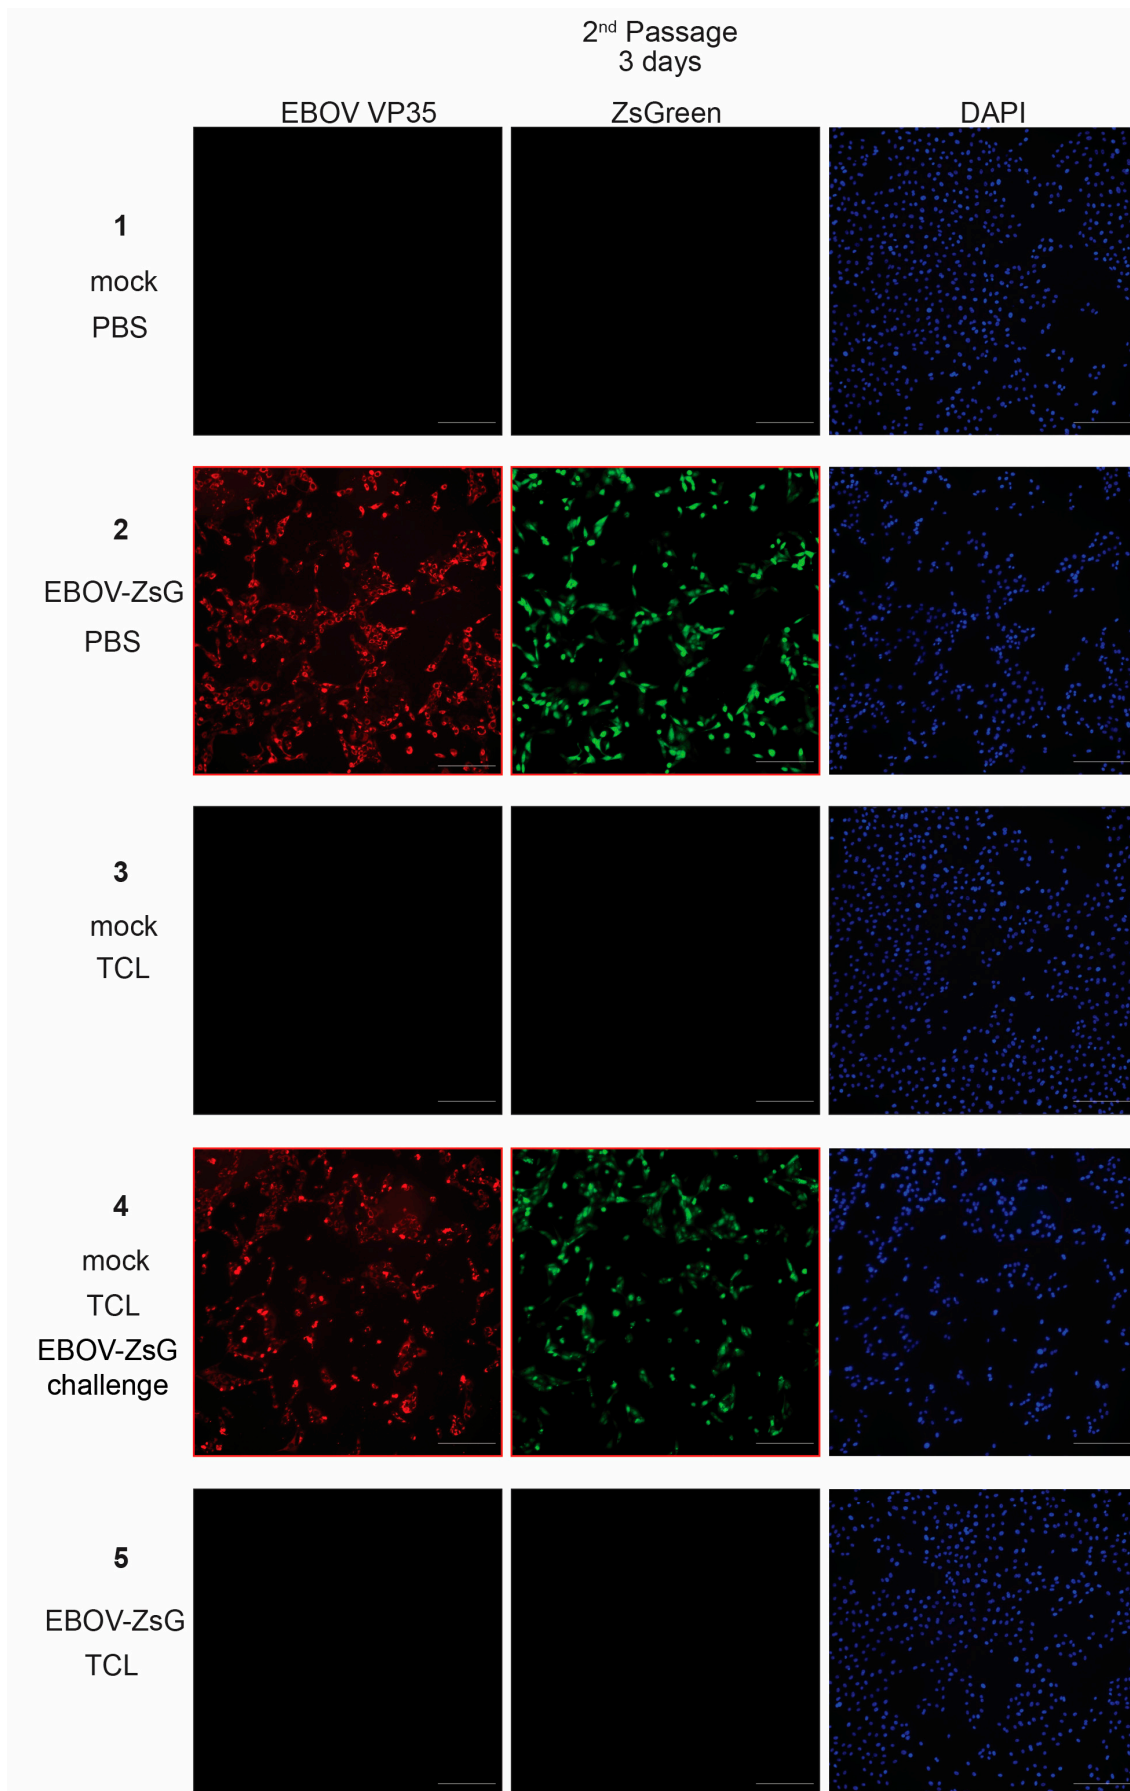

**Figure S3.** (3/3) Higher resolution versions of images from Figure 1. Scale bars = 250  $\mu$ m.

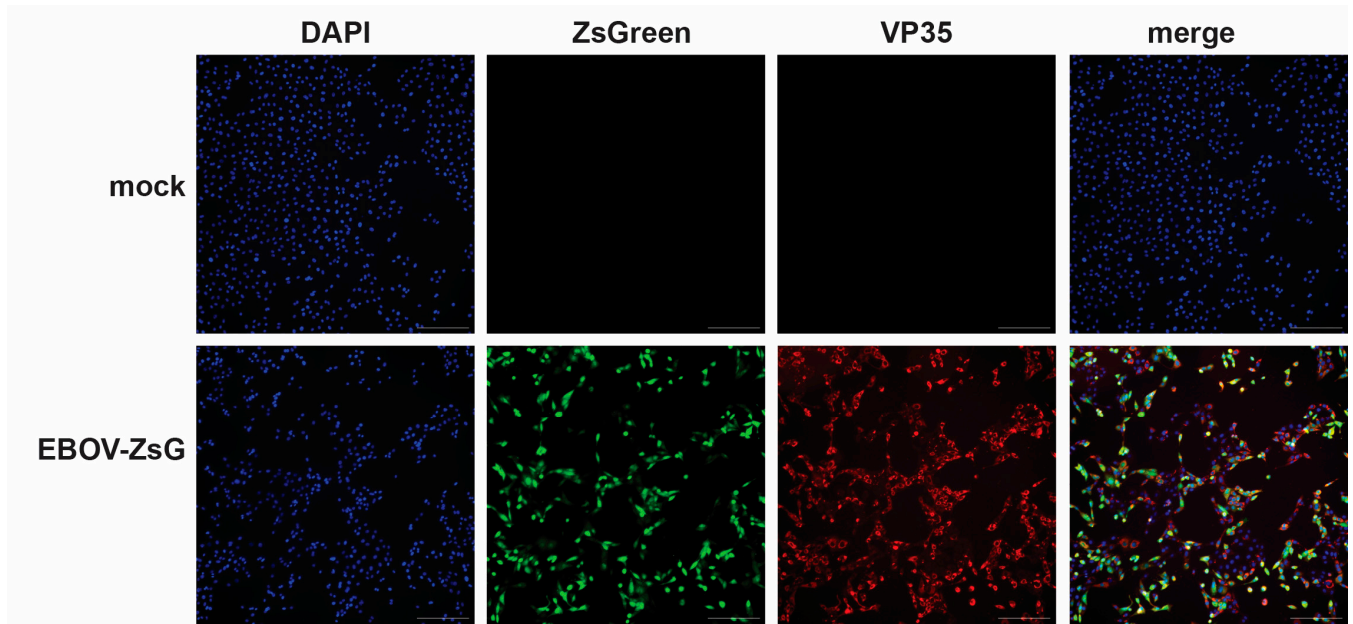

**Figure S4.** Initial infection rates of Vero E6 cells infected with EBOV-ZsGreen. Vero E6 cells seeded in 8-well chamber slides were mock-infected or infected with EBOV-ZsGreen (MOI = 3) in parallel with the infections in Figures 1 and S3 and fixed at 4 dpi. Immunofluorescence analysis was performed using an EBOV VP35 specific antibody. Cell nuclei were stained with DAPI. Red, EBOV VP35; green, ZsGreen fluorescence; blue, DAPI. Scale bars = 250  $\mu$ m.

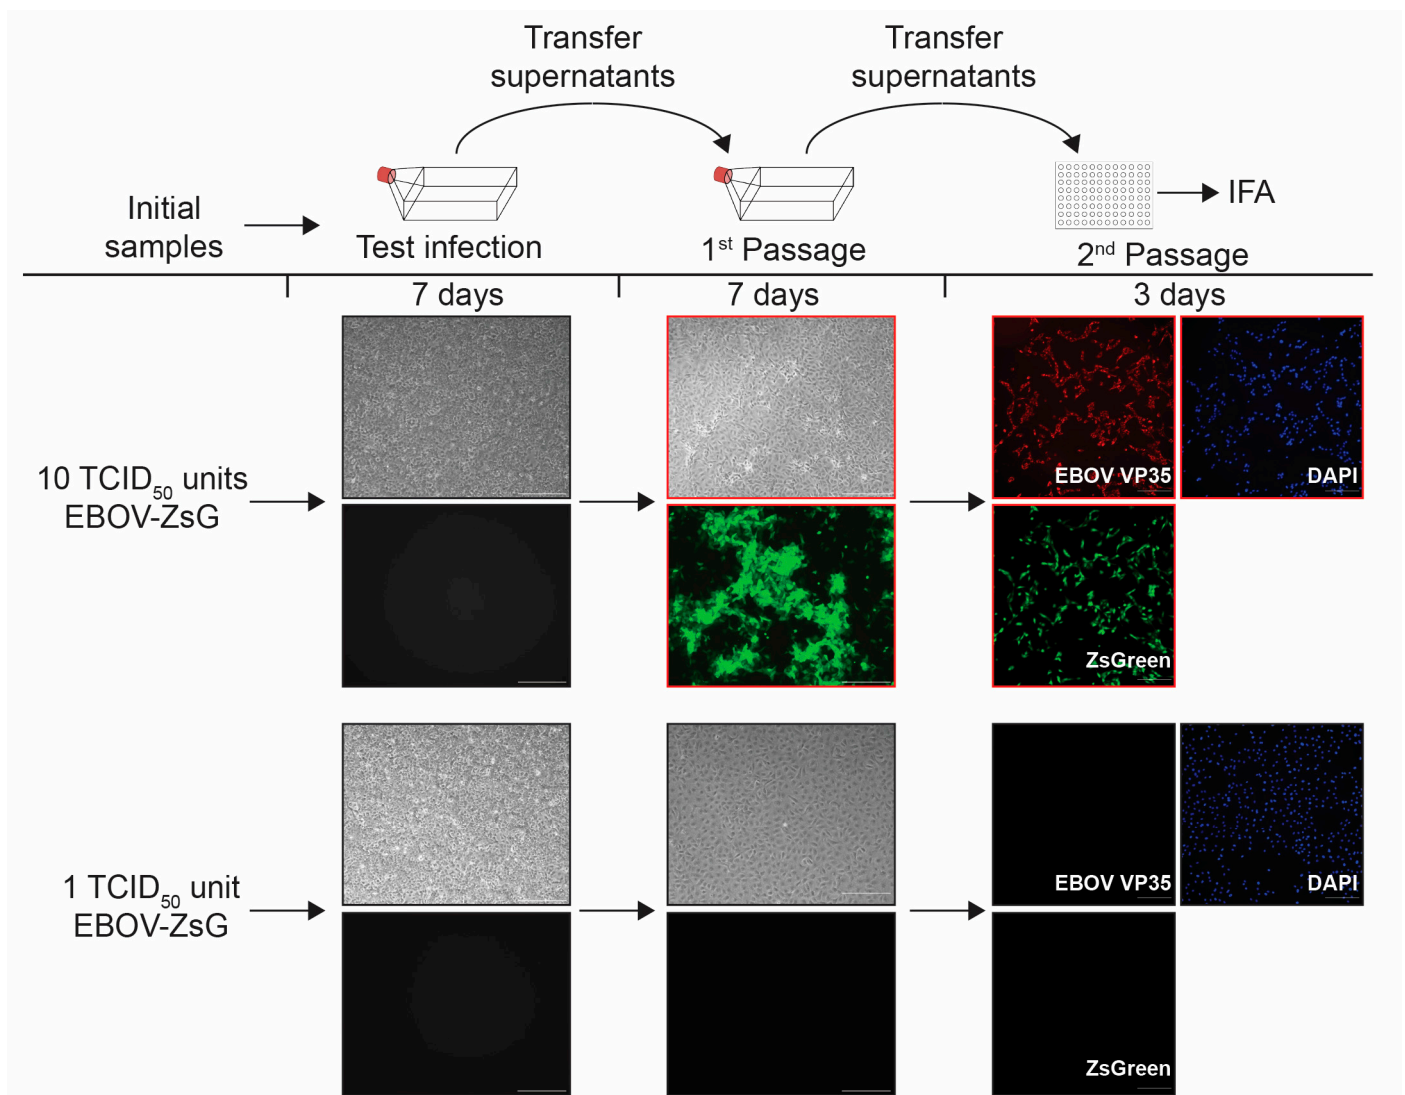

**Figure S5.** EBOV-ZsGreen limit of detection analysis. Top, schematic of the assay. Vero E6 cells seeded in T75 flasks were infected with the indicated amounts of infectious EBOV-ZsGreen particles. Samples were assessed for CPE and ZsGreen expression at 7dpi (Test infections). Clarified supernatants were used to infect Vero E6 cells seeded in T75 flasks. At 7 dpi, cells were assessed for the presence of CPE and fluorescence (1<sup>st</sup> Passage). Clarified supernatants were then used to infect Vero E6 cells seeded in 96-well plates and fixed at 3 dpi. Immunofluorescence analysis (IFA) was performed using an EBOV VP35 specific antibody. Cell nuclei were stained with DAPI. Red, EBOV VP35; green, ZsGreen fluorescence; blue, DAPI (2<sup>nd</sup> Passage). Black borders = CPE/fluorescence absent, red borders = CPE/fluorescence present. Scale bars = 250 μm.



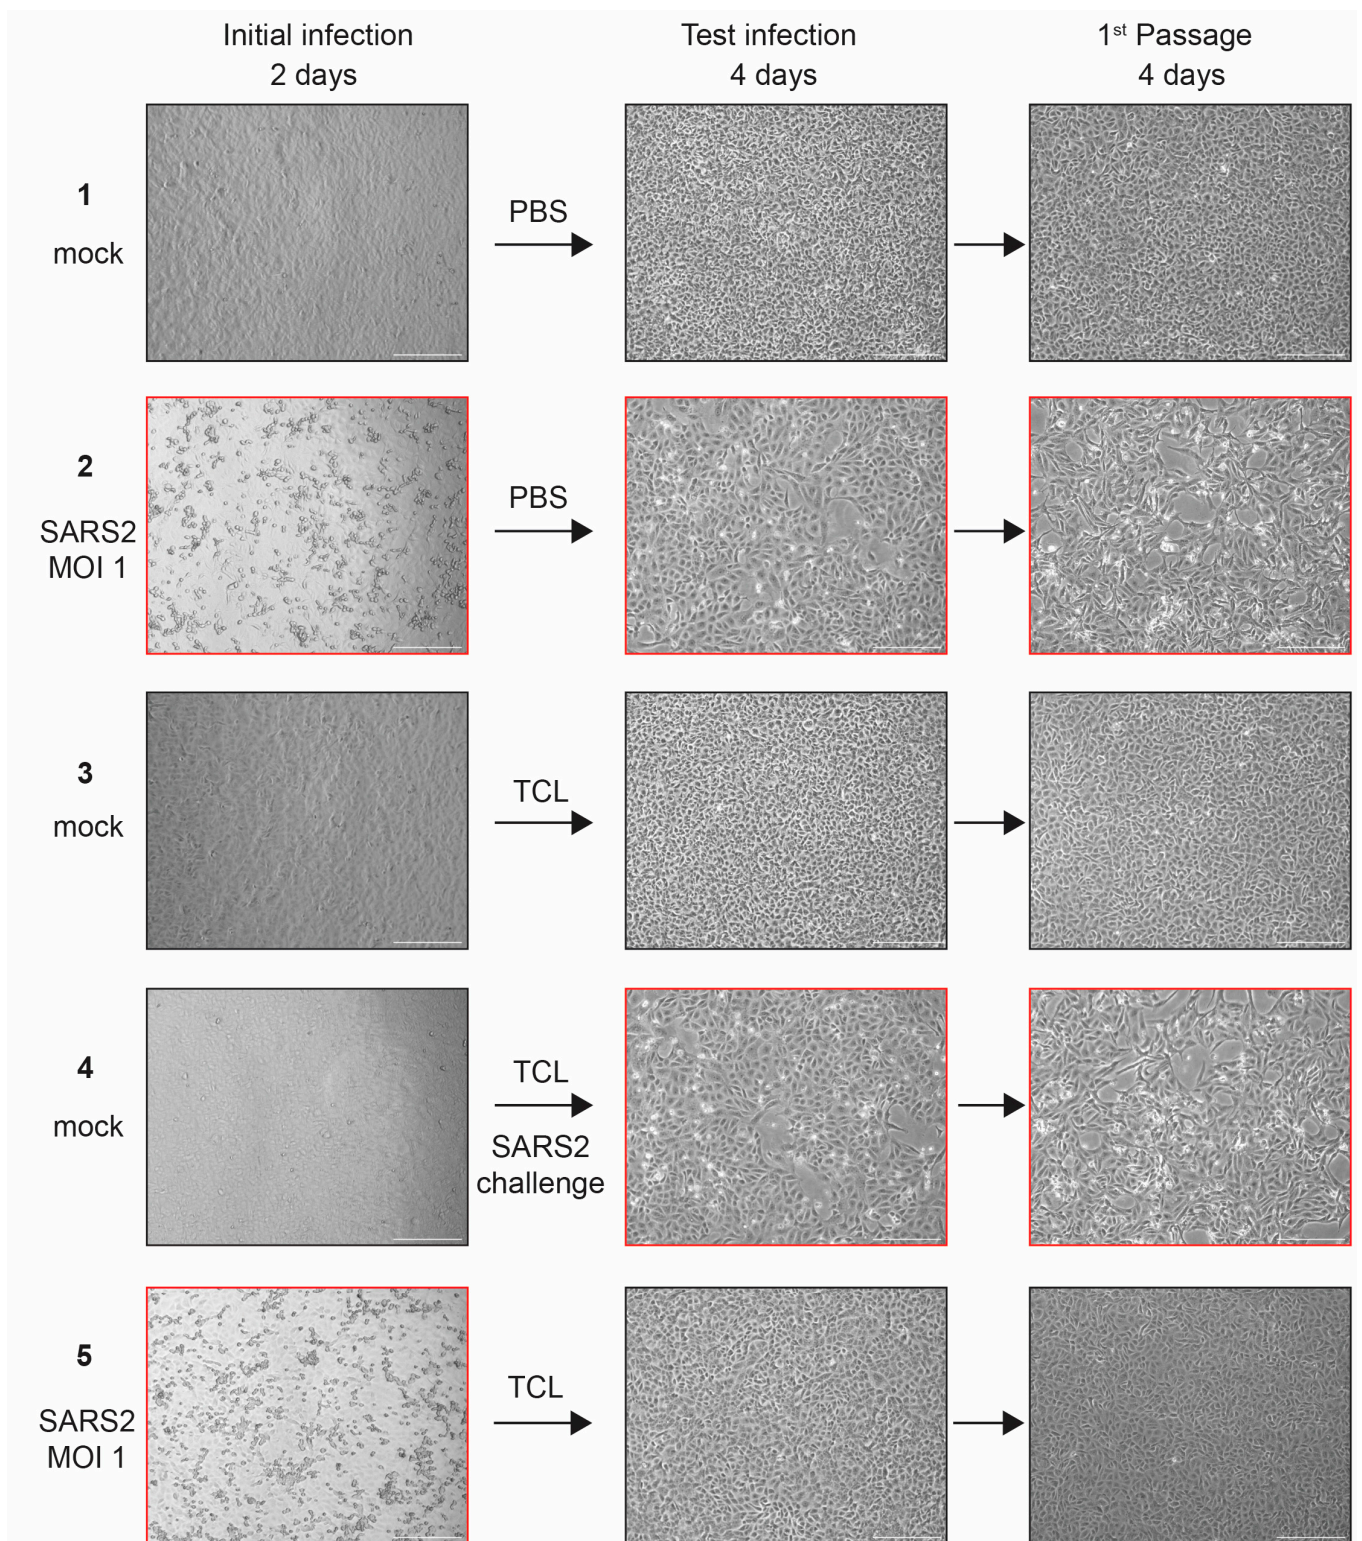

**Figure S6.** (1/2) Higher resolution versions of images from Figure 2. Scale bars = 250  $\mu$ m.



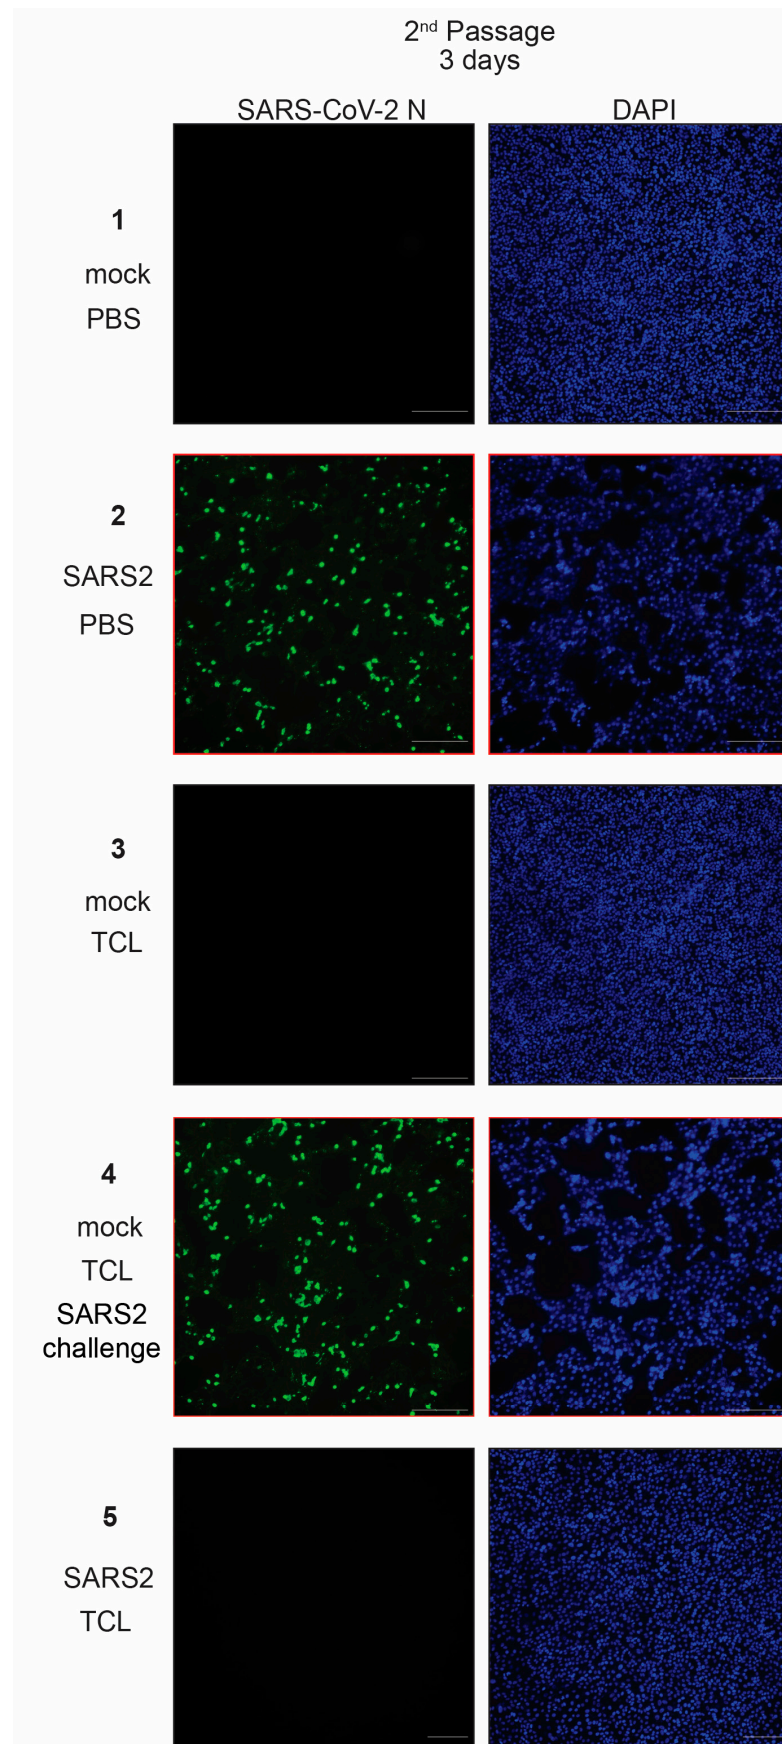

**Figure S6. (2/2)** Higher resolution versions of images from Figure 2. Scale bars = 250  $\mu$ m.

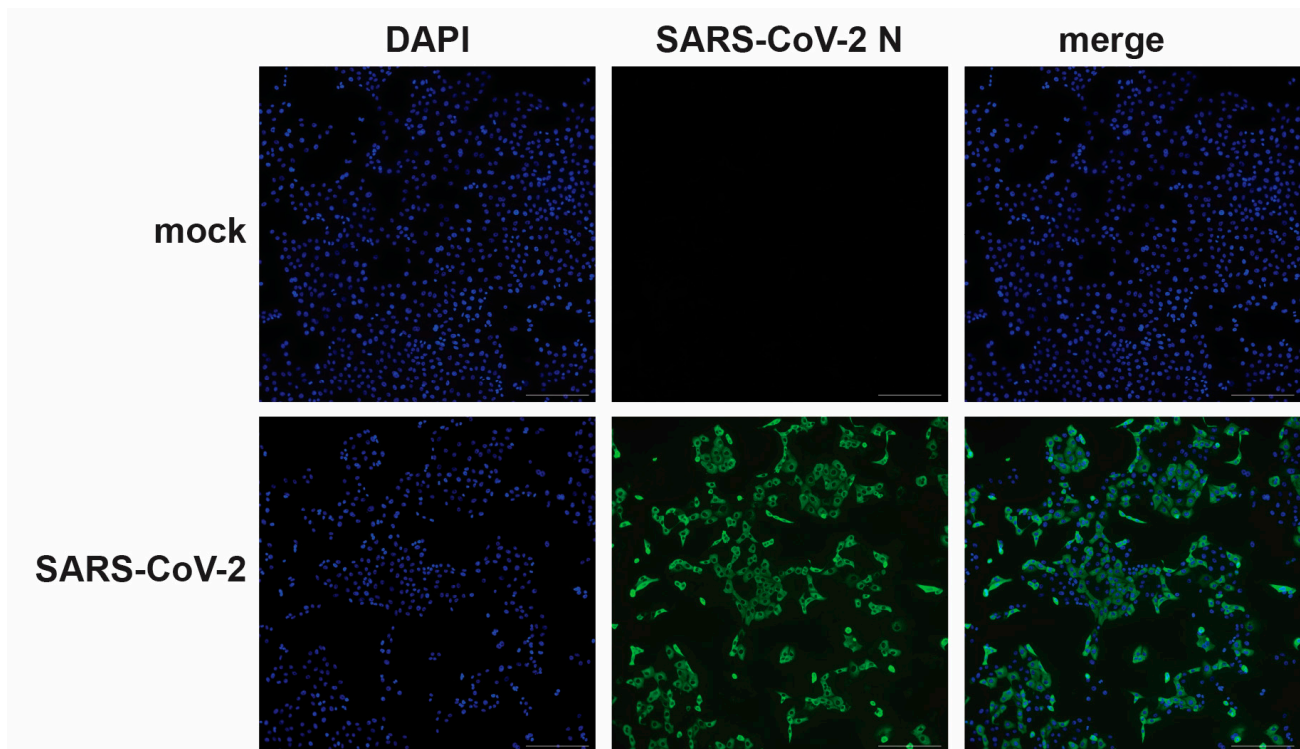

**Figure S7.** Initial infection rates of Vero E6 cells infected with SARS-CoV-2. Vero E6 cells seeded in 8-well chamber plates were mock-infected or infected with SARS-CoV-2 (MOI = 1) in parallel with the infections in Figures 2 and S6 and fixed at 2 dpi. Immunofluorescence analysis was performed using a SARS-CoV-2 N specific antibody. Cell nuclei were stained with DAPI. Green, SARS-CoV-2 N; blue, DAPI. Scale bars = 250  $\mu$ m.

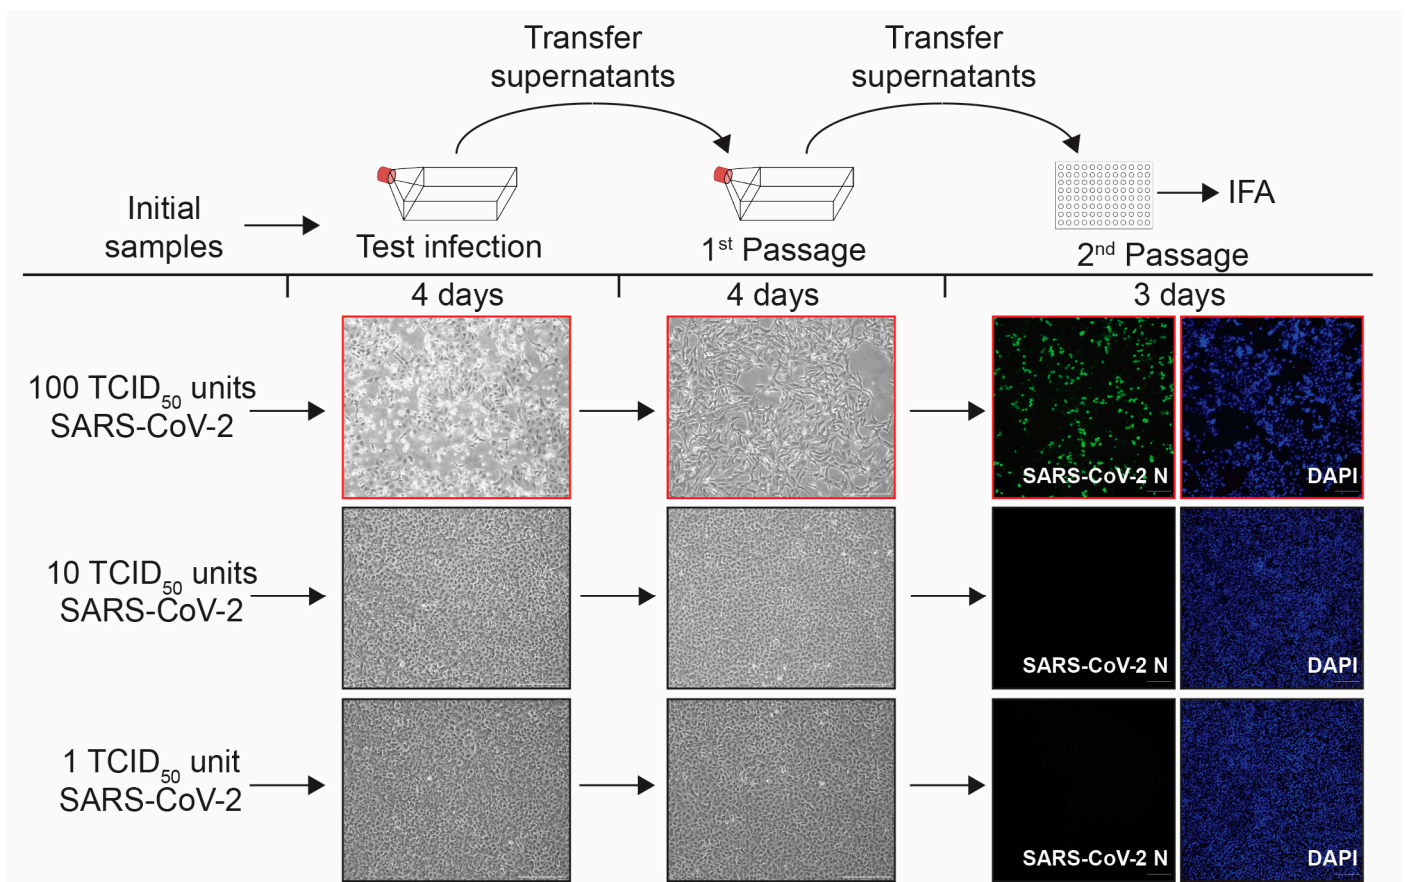

**Figure S8.** SARS-CoV-2 limit of detection analysis. Top, schematic of the assay. Vero E6 cells seeded in T75 flasks were infected with the indicated amounts of infectious SARS-CoV-2 particles. Samples were assessed for CPE at 4 dpi (Test infections). Clarified supernatants were transferred onto Vero E6 cells. At 4 dpi, cells were assessed for the presence of CPE (1<sup>st</sup> Passage). Clarified supernatants were then used to infect Vero E6 cells seeded in 96-well plates and fixed at 3 dpi. Immunofluorescence analysis (IFA) was performed using a SARS-CoV-2 N specific antibody. Cell nuclei were stained with DAPI. Green, SARS-CoV-2 N; blue, DAPI (2<sup>nd</sup> Passage). Black borders = CPE absent, red borders = CPE present. Scale bars = 250  $\mu$ m.



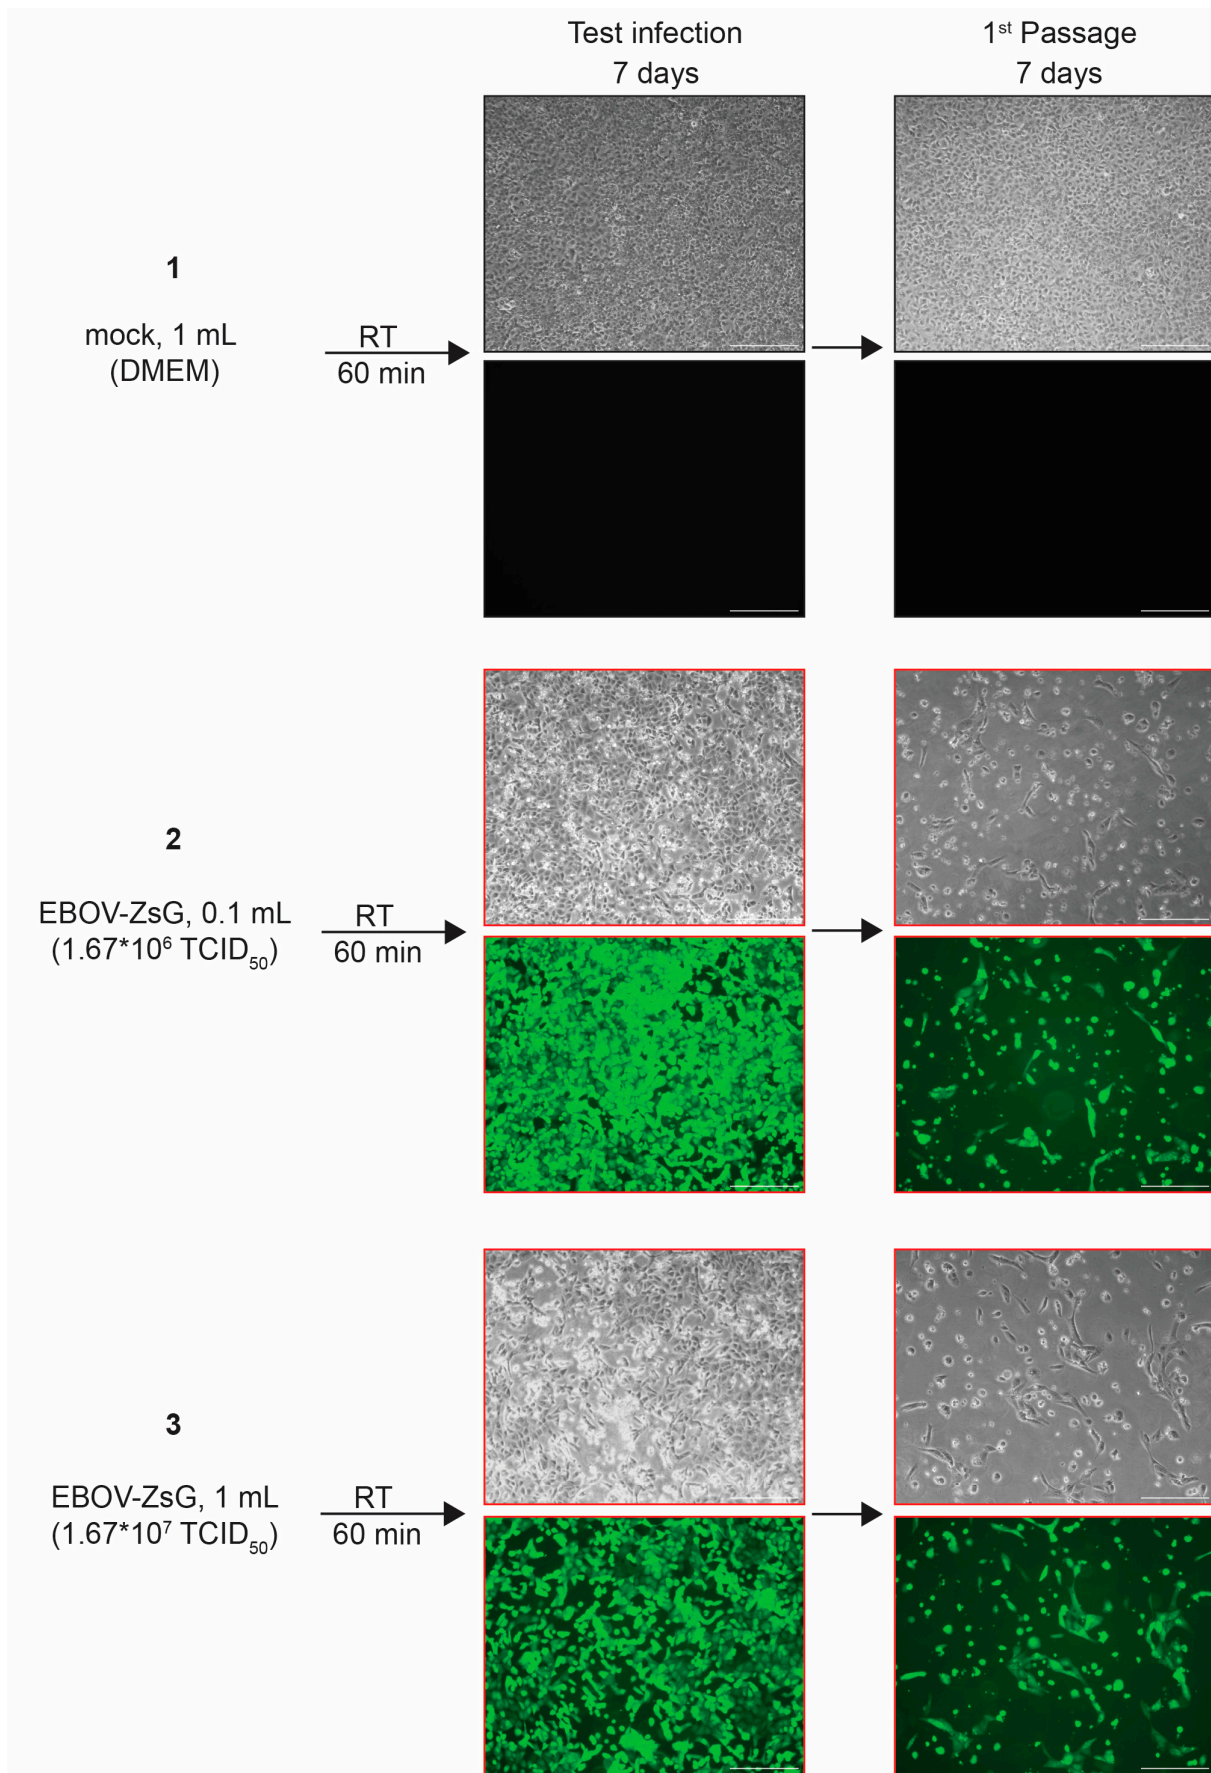

**Figure S9.** (1/6) Higher resolution versions of images from Figure 3. Scale bars = 250  $\mu$ m.



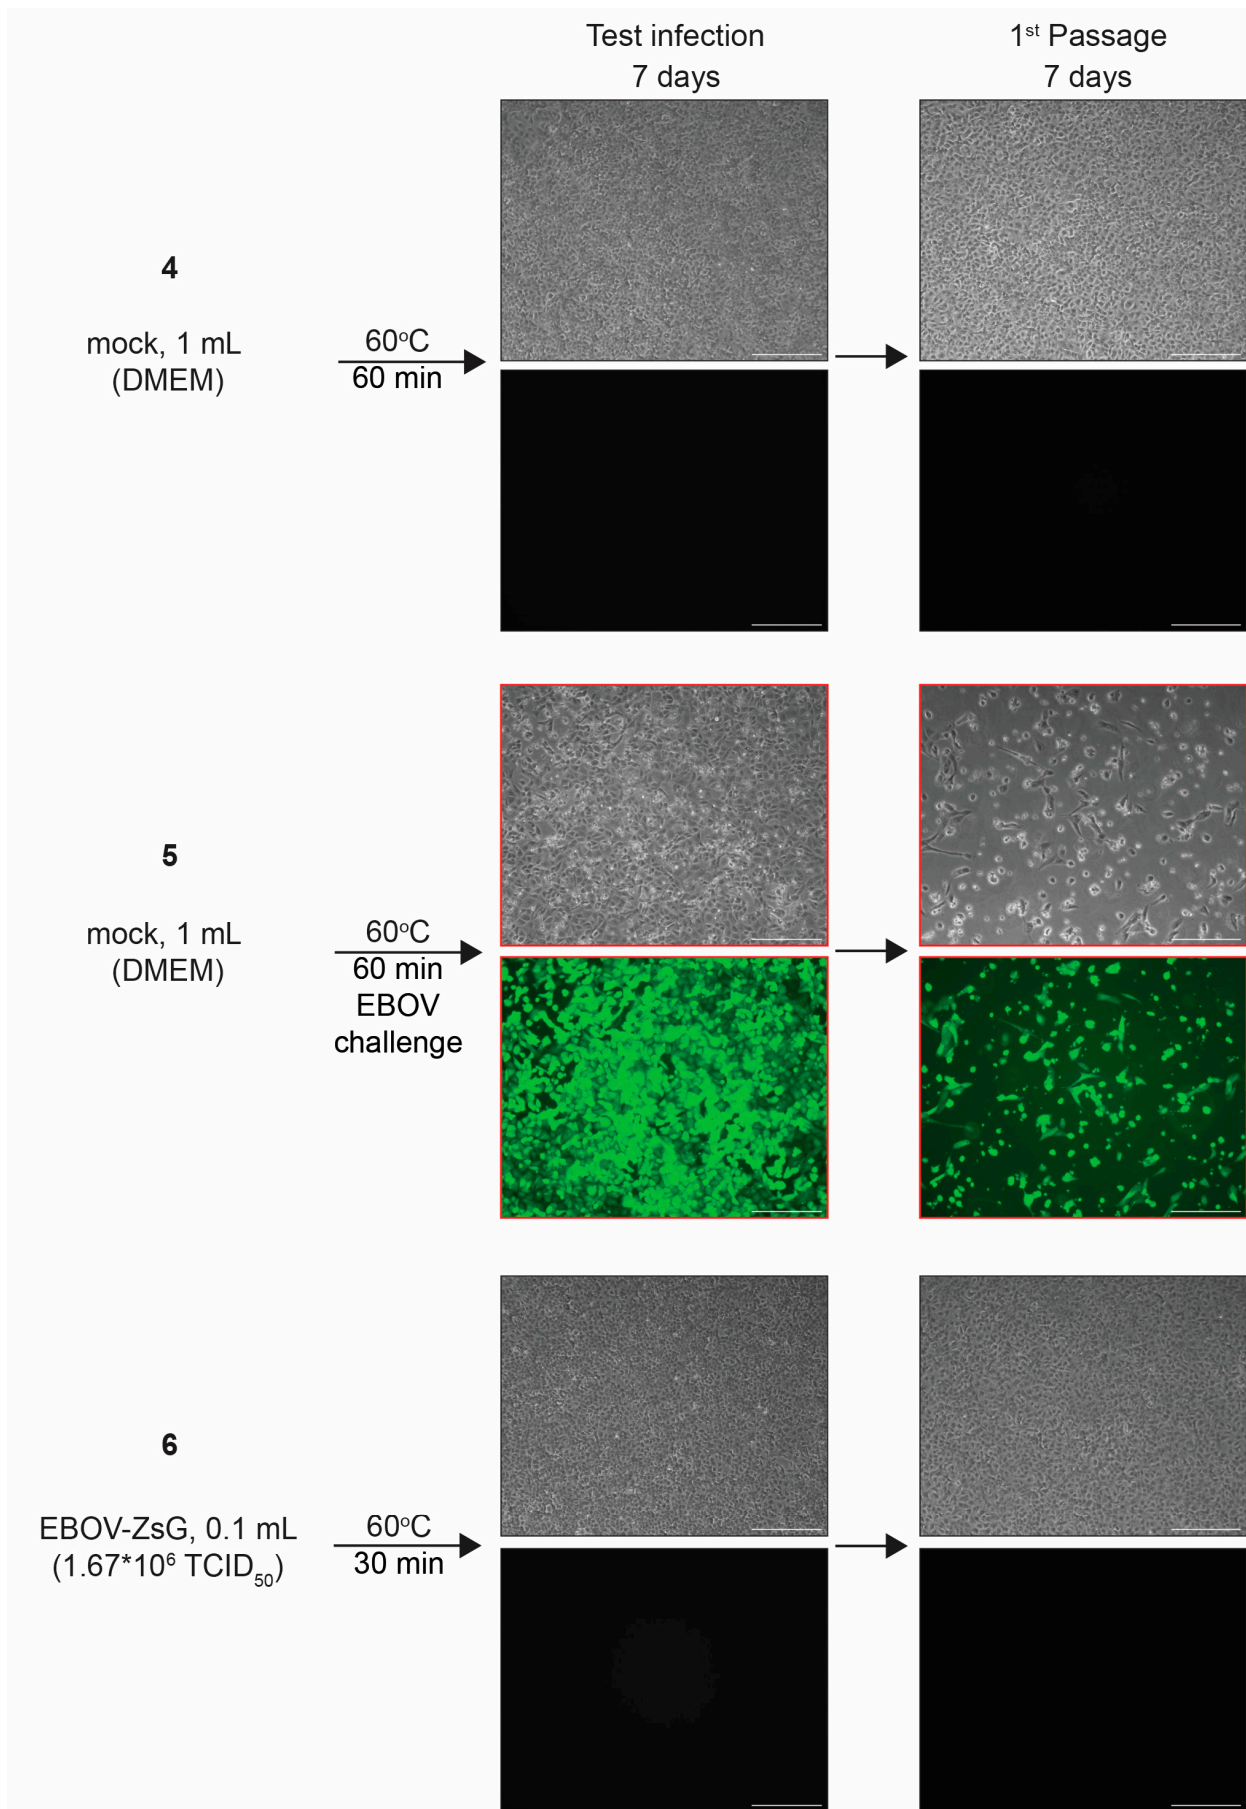

**Figure S9.** (2/6) Higher resolution versions of images from Figure 3. Scale bars = 250 µm.

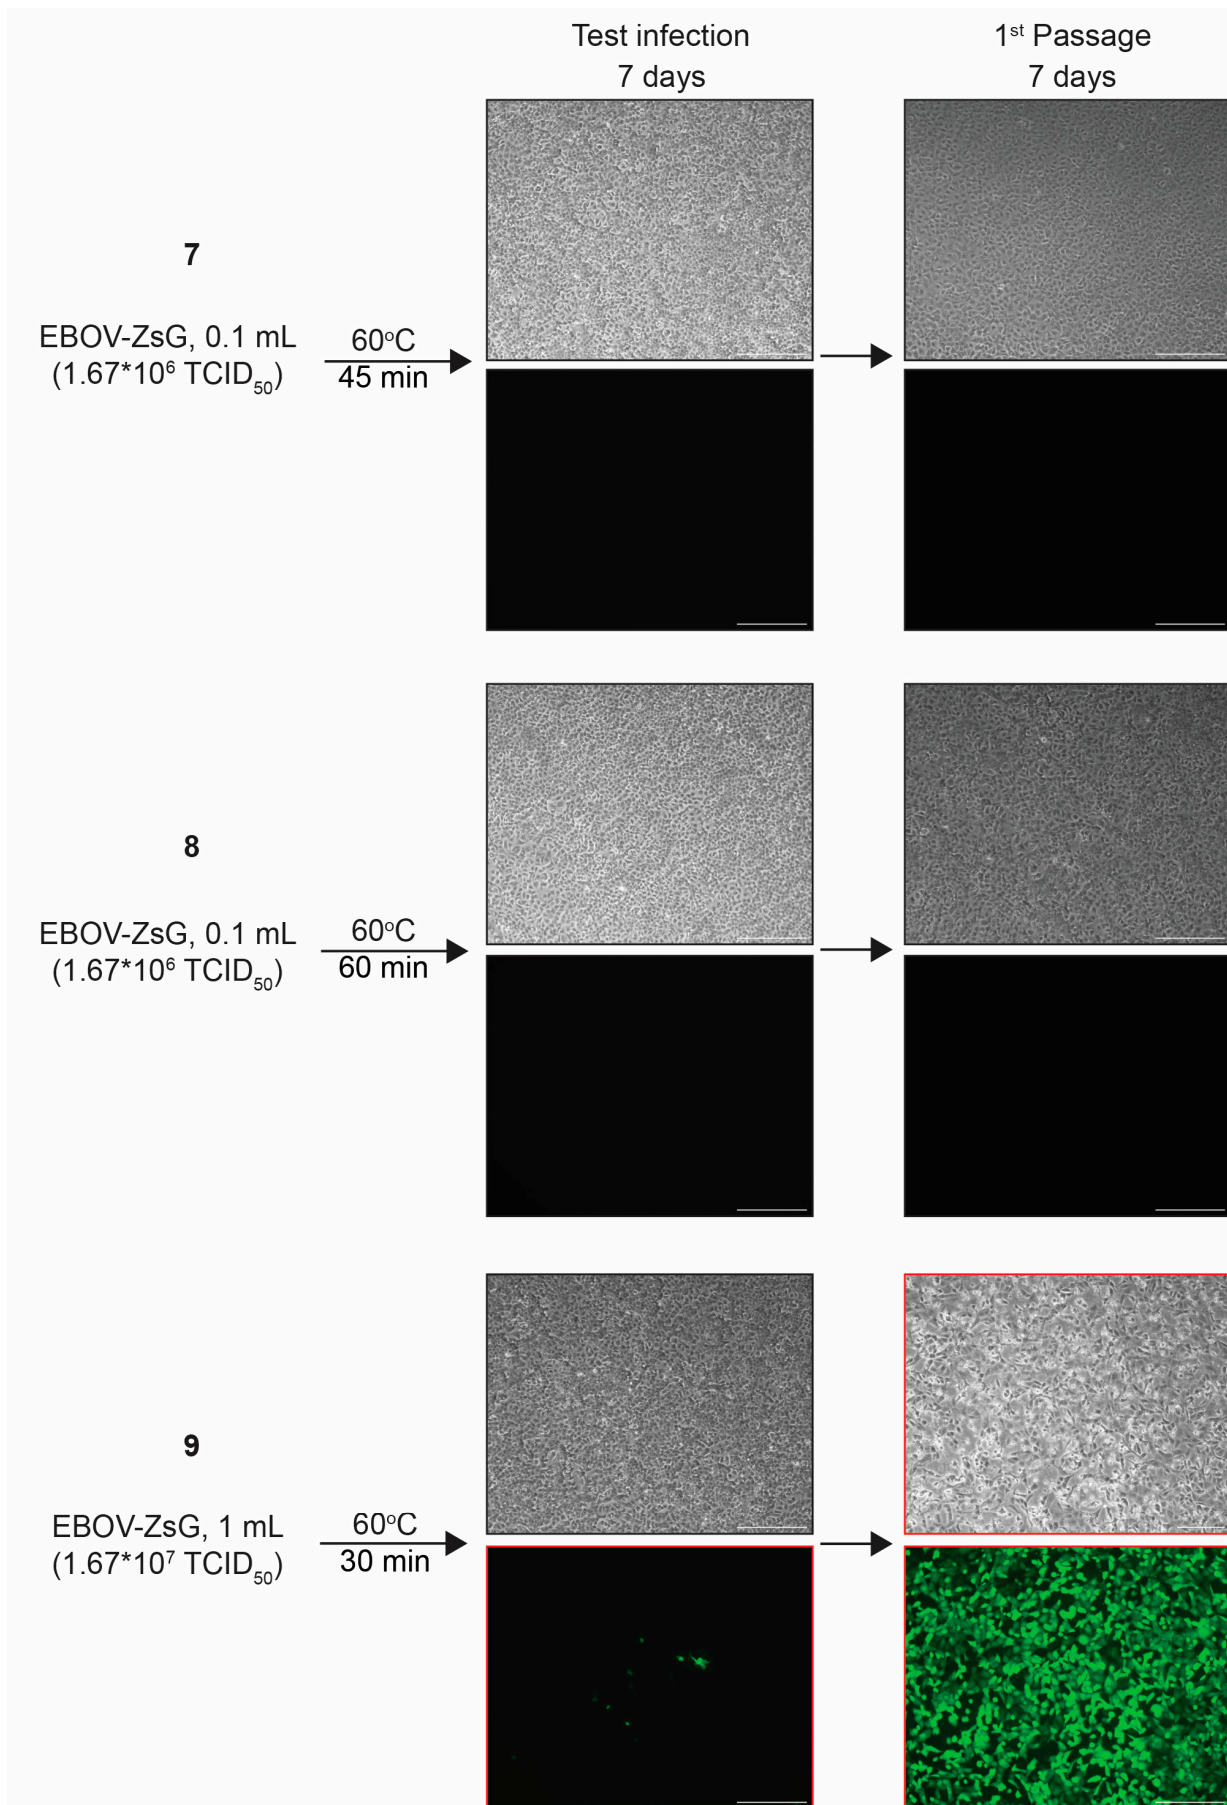

**Figure S9.** (3/6) Higher resolution versions of images from Figure 3. Scale bars = 250  $\mu$ m.

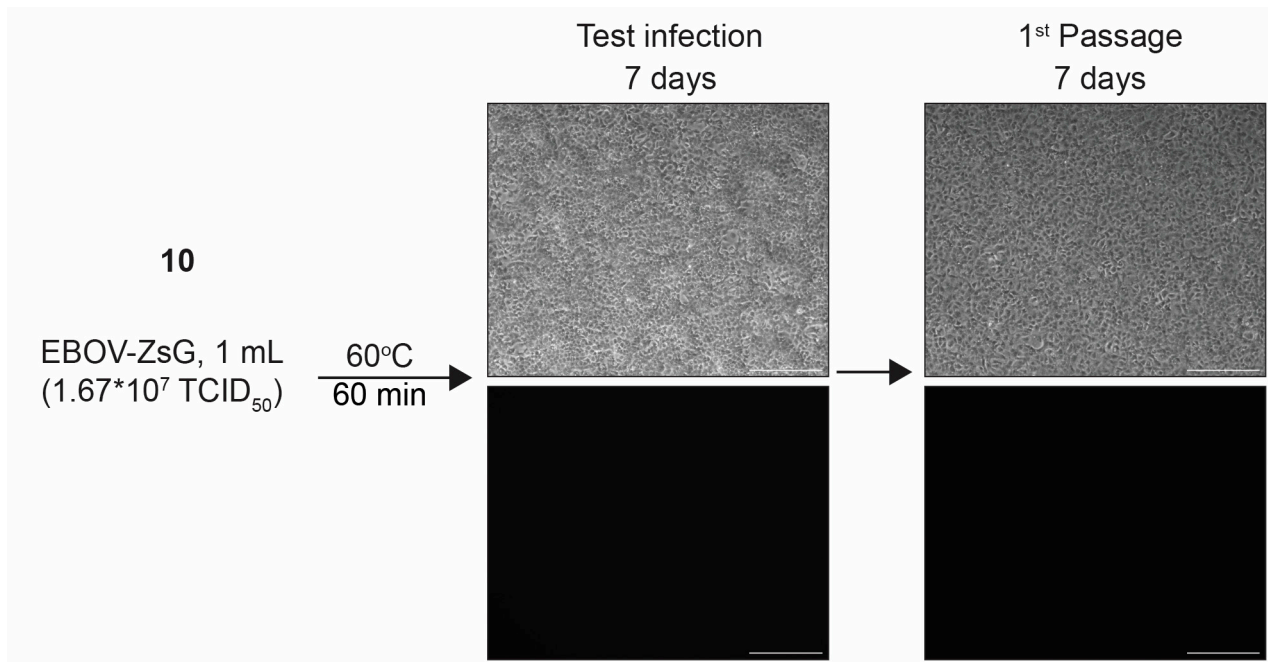

**Figure S9.** (4/6) Higher resolution versions of images from Figure 3. Scale bars = 250  $\mu$ m.



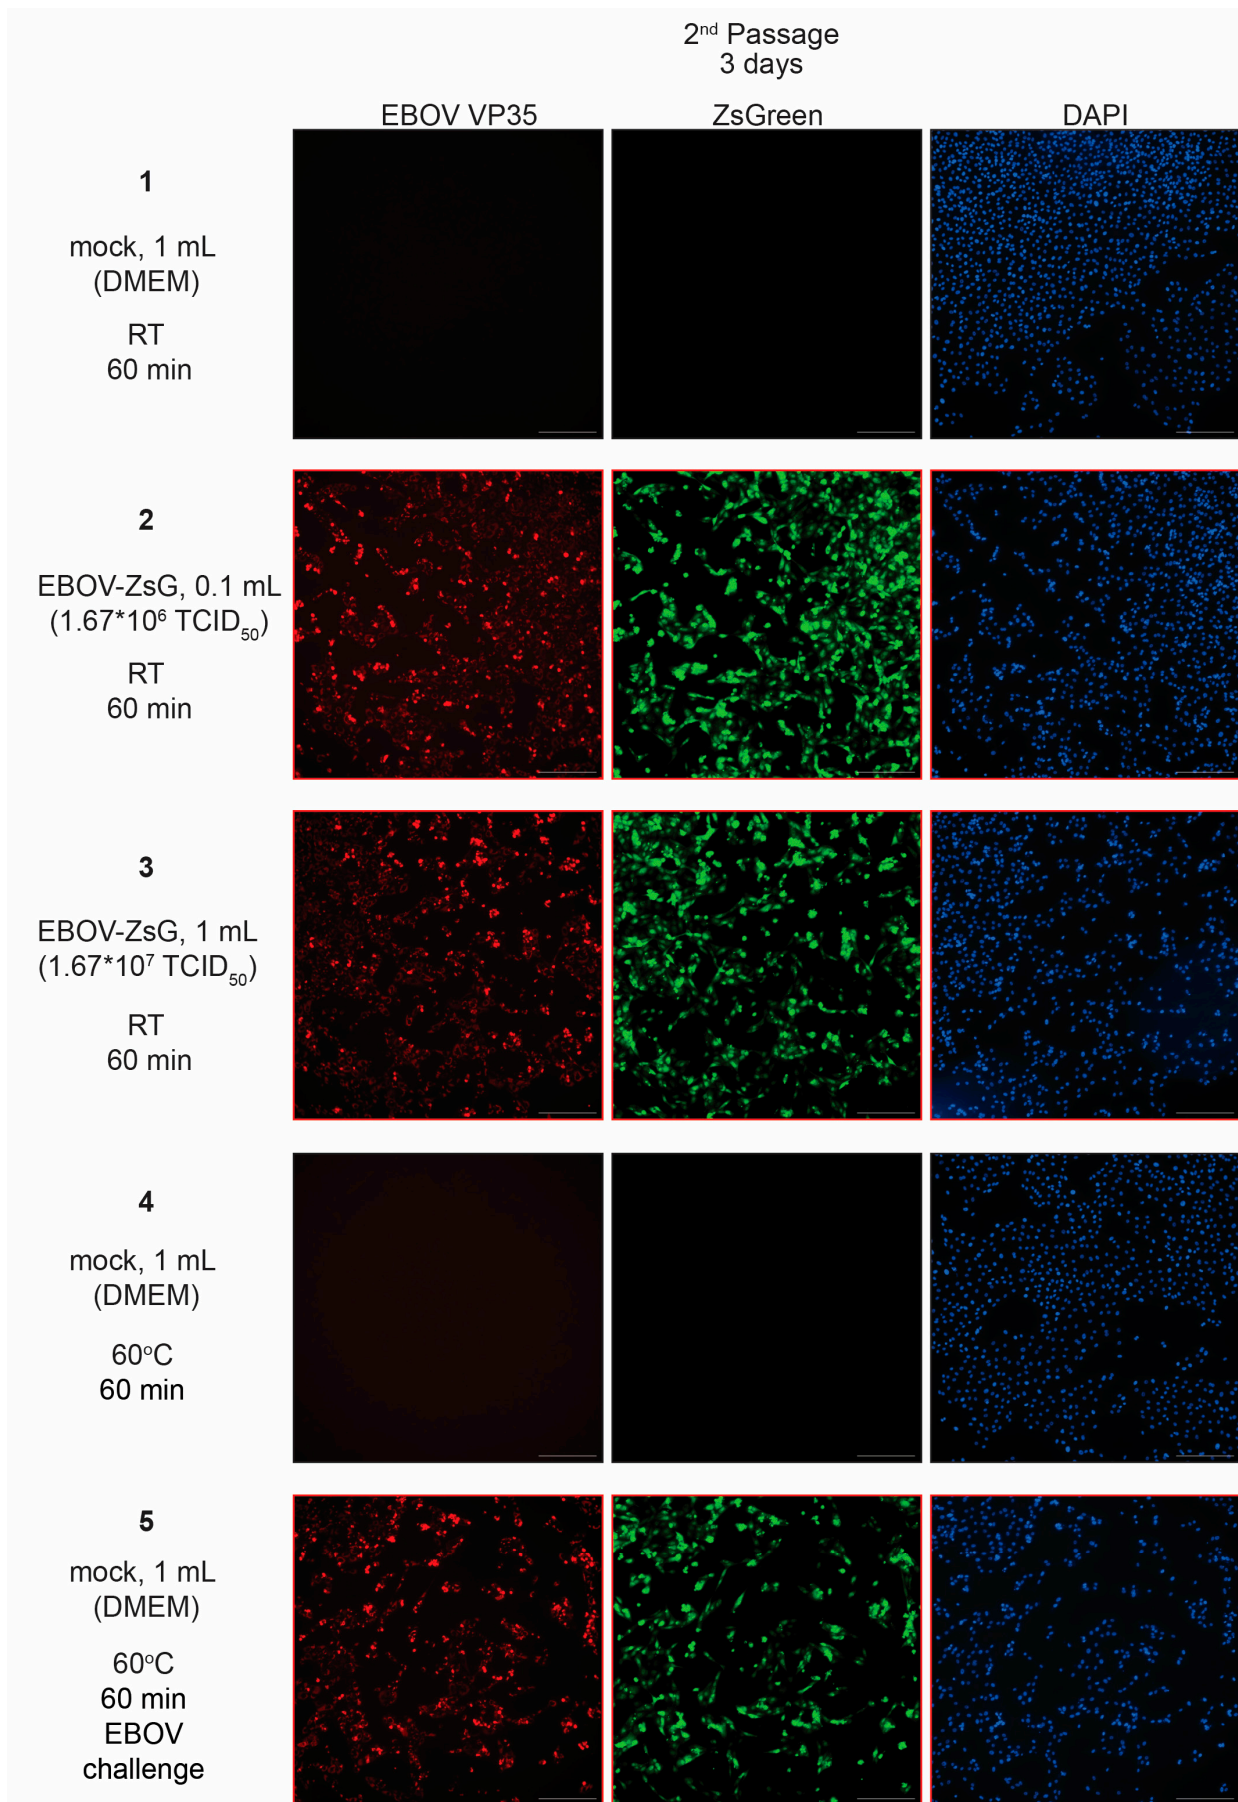

**Figure S9.** (5/6) Higher resolution versions of images from Figure 3. Scale bars = 250  $\mu$ m.



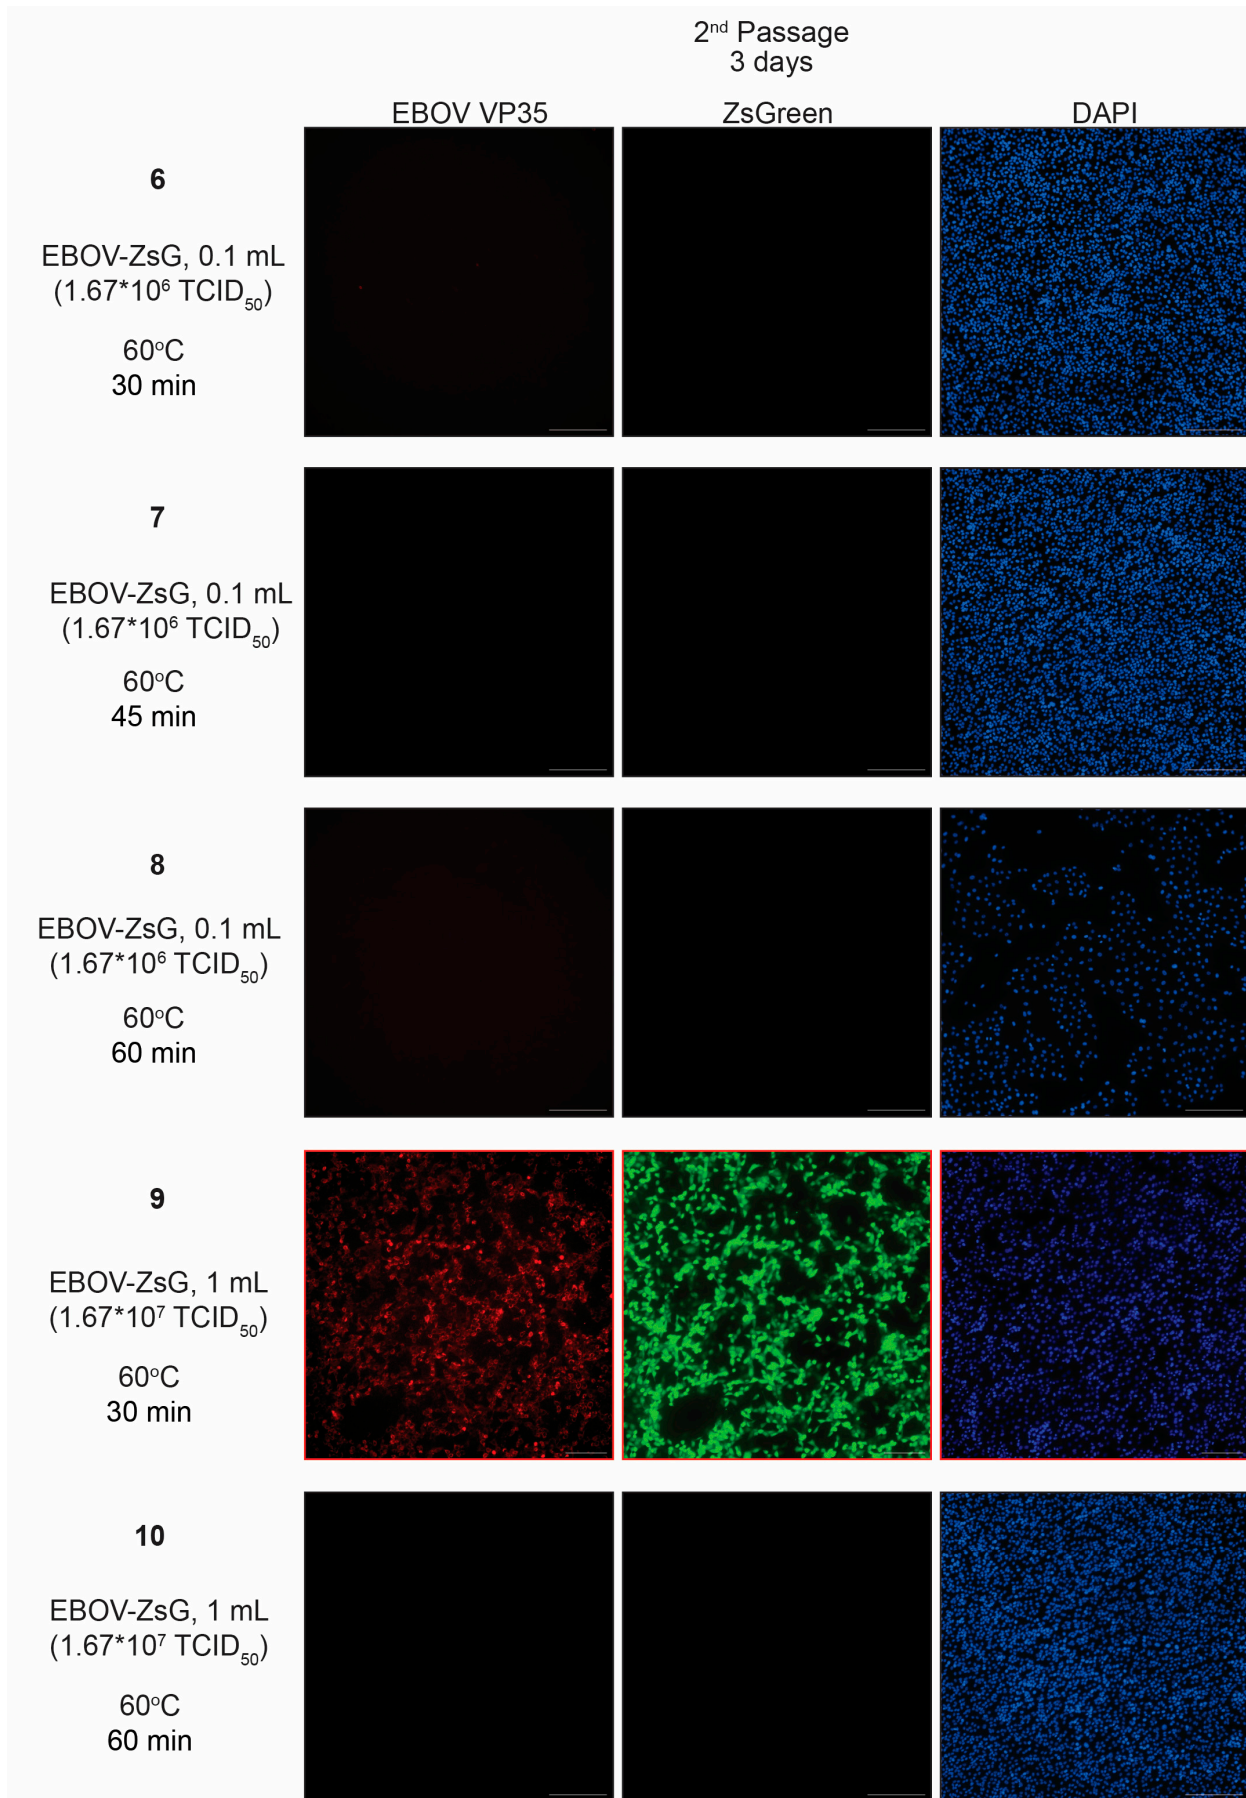

**Figure S9.** (6/6) Higher resolution versions of images from Figure 3. Scale bars = 250  $\mu$ m.
